# Supplementary material
Source: publisher site journal article supplement (https://www.dovepress.com/article/supplementary_file/580964/Supplementary%20Materials_1.docx)
Supplement: Supplementary file 1 [file Supplementary%20Materials_1.docx]

**Table S1.** Clinical characteristics of the participants included for lung tissue pathological section analysis

| **Characteristics** | **Non-smoker (n=5)** | **Smoker (n=5)** | **COPD (n=5)** |
| --- | --- | --- | --- |
| Age (Years) | 64.0±3.9 | 65.8±5.9 | 65.5±4.6 |
| Pack-years | 0*, † | 29.0±6.5 | 31.1±3.5 |
| FEV1/FVC (%) | 79.1±3.2† | 80.4±2.4† | 62.3±2.5 |
| FEV1 predicted (%) | 84.5±3.2† | 83.5±4.2† | 71.7±7.4 |
| **P* < 0.05 compared with smoker participants  †*P* < 0.05 compared with COPD participants | | | |

**Table S2.** Primers for qRT-PCR

| **Gene symbol** | **Primer sequence (5'-3′)** |
| --- | --- |
| Human LAMC2 | Forward: TACCAGAGCCAAGAACGCTG Reverse: CGCAGTTGGCTGTTGATCTG |
| Human E-cadherin | Forward: AGTCACTGACACCAACGATAAT Reverse: ATCGTTGTTCACTGGATTTGTG |
| Human N-cadherin | Forward: CGATAAGGATCAACCCCATACA Reverse: TTCAAAGTCGATTGGTTTGACC |
| Human Fibronectin | Forward: CCGAGGTTTTAACTGCGAGAGTAA Reverse: TCATGGAGTCTTTAGGACGCTCA |
| Human β-actin | Forward: GGAAATCGTGCGTGACATTAA Reverse: AGGAAGGAAGGCTGGAAGAG |
| Mouse LAMC2 | Forward: AGAGAACGGCTGTGTGTAGC  Reverse: TGACTCAGTCCTGGCCCC |


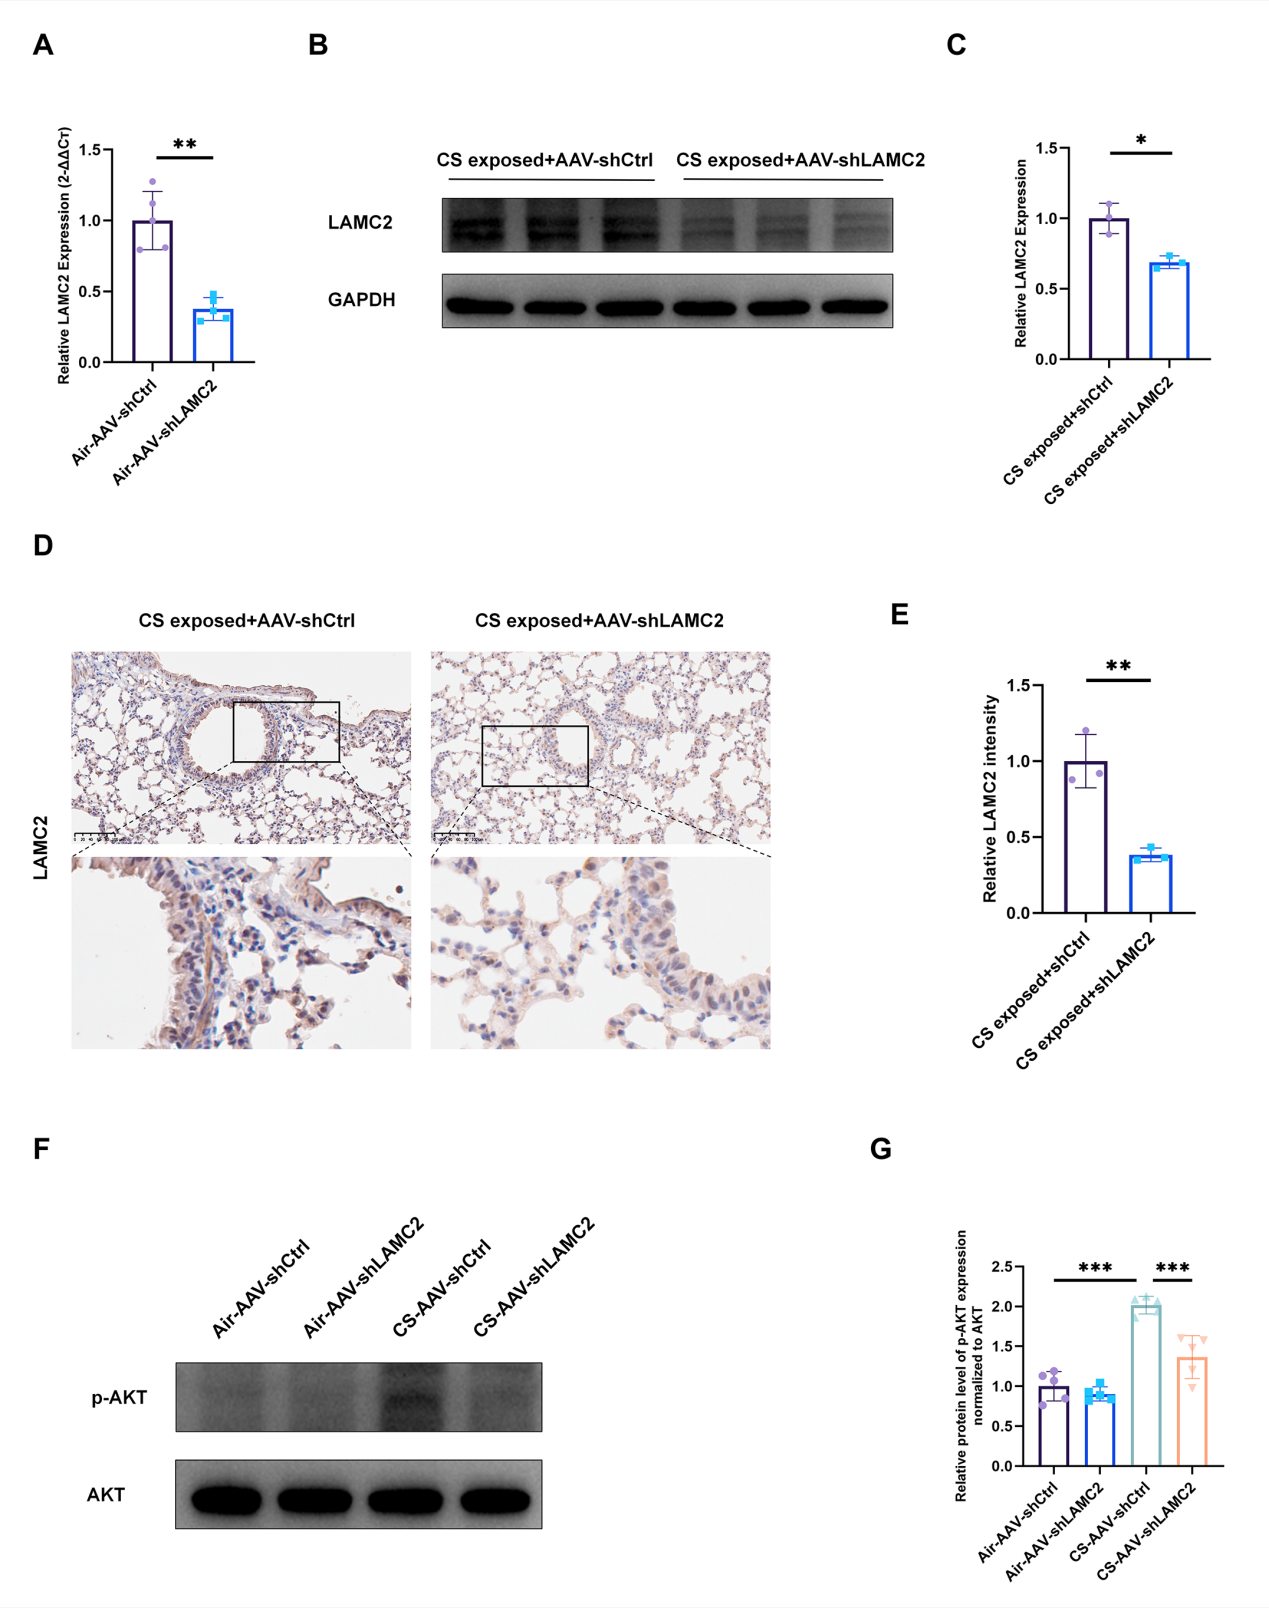


Figure S1. Validation of LAMC2 knockdown efficiency in vivo and its effect on pulmonary p-AKT expression in mice. (A) The mRNA expression level of LAMC2 in mouse lung tissues was assessed following treatment with AAV-shCtrl or AAV-shLAMC2 (n=5 mice per group).(B) Western blot and (C) the relative protein level of LAMC2 in the CS exposed mice treated with AAV-shCtrl or AAV-shLAMC2 groups (n=3 mice per group). (D) Representative immunohistochemical staining of LAMC2 in lung tissue sections from CS-AAV-shCtrl and CS-AAV-shLAMC2 groups. (E) Quantitative analysis of LAMC2 immunostaining intensity in airway epithelial cells from the above two groups (n=3 mice per group). (F)-(G) Western blot and the relative protein level of p-AKT in the different groups of mice (n=5 mice per group). Data are shown as the means ± SD. **P* < 0.05, ***P* < 0.01, ****P* < 0.001. Scale bar: 100 μm.
